# Supplementary material
Source: publisher site journal article supplement (https://www.spandidos-publications.com/5004/downloadSupplementary)
Supplement: Supplementary file 1 [file downloadSupplementary]

## Sheet: Table SIII
Table SIII. The 669 co-expressed genes with DPY30.
gene_name	gene_id	gene_biotype	cor_spearman	p_spearman
TOMM40	ENSG00000130204	protein_coding	0.419124	3.873*10^-8
COX17	ENSG00000138495	protein_coding	0.457461	1.409*10^-9
PSMB6	ENSG00000142507	protein_coding	0.446828	3.720*10^-9
C1orf35	ENSG00000143793	protein_coding	0.566936	0.000*10^+0
ATP23	ENSG00000166896	protein_coding	0.409666	8.203*10^-8
FLYWCH2	ENSG00000162076	protein_coding	0.405841	1.104*10^-7
BCL7C	ENSG00000099385	protein_coding	0.469045	4.568*10^-10
UQCRB	ENSG00000156467	protein_coding	0.401144	1.582*10^-7
MPLKIP	ENSG00000168303	protein_coding	0.507292	0.000*10^+0
MRPL22	ENSG00000082515	protein_coding	0.456151	1.592*10^-9
RMI2	ENSG00000175643	protein_coding	0.48764	5.568*10^-11
SLC18A2	ENSG00000165646	protein_coding	-0.410591	7.629*10^-8
EIF3I	ENSG00000084623	protein_coding	0.433302	1.203*10^-8
ZCCHC17	ENSG00000121766	protein_coding	0.450342	2.714*10^-9
ZZEF1	ENSG00000074755	protein_coding	-0.436596	9.088*10^-9
RPF2	ENSG00000197498	protein_coding	0.404605	1.214*10^-7
ITGB3BP	ENSG00000142856	protein_coding	0.458093	1.328*10^-9
RPL38	ENSG00000172809	protein_coding	0.475709	2.278*10^-10
FGF10	ENSG00000070193	protein_coding	-0.41155	5.309*10^-8
MZT2B	ENSG00000152082	protein_coding	0.408534	8.959*10^-8
RPS24	ENSG00000138326	protein_coding	0.432743	1.261*10^-8
POLR2I	ENSG00000105258	protein_coding	0.487669	5.547*10^-11
RBM8B	ENSG00000258427	processed_pseudogene	0.459722	1.138*10^-9
ECE2	ENSG00000145194	protein_coding	0.41056	7.648*10^-8
NEK2	ENSG00000117650	protein_coding	0.400591	1.650*10^-7
RAN	ENSG00000132341	protein_coding	0.477154	1.947*10^-10
NSMCE1	ENSG00000169189	protein_coding	0.405553	1.129*10^-7
SAAL1	ENSG00000166788	protein_coding	0.419996	3.610*10^-8
SLBP	ENSG00000163950	protein_coding	0.555279	0.000*10^+0
RPA3	ENSG00000106399	protein_coding	0.538298	0.000*10^+0
LRP1	ENSG00000123384	protein_coding	-0.408486	8.993*10^-8
EMD	ENSG00000102119	protein_coding	0.411828	6.924*10^-8
SMIM10L1	ENSG00000256537	protein_coding	0.423079	2.811*10^-8
KATNA1	ENSG00000186625	protein_coding	0.432687	1.267*10^-8
RPS7P11	ENSG00000213326	processed_pseudogene	0.475901	2.232*10^-10
ATG2B	ENSG00000066739	protein_coding	-0.414935	5.415*10^-8
RPS27AP1	ENSG00000242692	processed_pseudogene	0.409965	8.013*10^-8
CCDC124	ENSG00000007080	protein_coding	0.428416	1.811*10^-8
MEAF6	ENSG00000163875	protein_coding	0.529599	0.000*10^+0
TRMT112	ENSG00000173113	protein_coding	0.524755	0.000*10^+0
COMMD4	ENSG00000140365	protein_coding	0.439399	7.141*10^-9
VPS13C	ENSG00000129003	protein_coding	-0.439314	7.193*10^-9
POLR2H	ENSG00000163882	protein_coding	0.451415	2.462*10^-9
OXLD1	ENSG00000204237	protein_coding	0.445648	4.132*10^-9
HDAC2	ENSG00000196591	protein_coding	0.447257	3.581*10^-9
SNRPE	ENSG00000182004	protein_coding	0.629522	0.000*10^+0
SUMO2	ENSG00000188612	protein_coding	0.527555	0.000*10^+0
SF3B5	ENSG00000169976	protein_coding	0.403272	1.345*10^-7
C19orf53	ENSG00000104979	protein_coding	0.493729	2.282*10^-11
RPL37	ENSG00000145592	protein_coding	0.403679	1.304*10^-7
DAP3	ENSG00000132676	protein_coding	0.421995	3.070*10^-8
DKC1	ENSG00000130826	protein_coding	0.447779	3.418*10^-9
PCGF1	ENSG00000115289	protein_coding	0.640982	0.000*10^+0
CISD2	ENSG00000145354	protein_coding	0.417332	4.473*10^-8
LAMTOR5	ENSG00000134248	protein_coding	0.486923	6.117*10^-11
HSPE1	ENSG00000115541	protein_coding	0.463705	7.761*10^-10
PPIA	ENSG00000196262	protein_coding	0.449258	2.993*10^-9
FAM72D	ENSG00000215784	protein_coding	0.508367	0.000*10^+0
ALYREF	ENSG00000183684	protein_coding	0.420646	3.426*10^-8
PPIE	ENSG00000084072	protein_coding	0.456575	1.531*10^-9
LYAR	ENSG00000145220	protein_coding	0.500043	6.033*10^-12
CENPA	ENSG00000115163	protein_coding	0.506549	0.000*10^+0
JAK2	ENSG00000096968	protein_coding	-0.400774	1.627*10^-7
DPH5	ENSG00000117543	protein_coding	0.437601	8.338*10^-9
ZNF460	ENSG00000197714	protein_coding	-0.515412	0.000*10^+0
TBCAP1	ENSG00000226781	processed_pseudogene	0.436921	8.838*10^-9
TCOF1	ENSG00000070814	protein_coding	0.404619	1.213*10^-7
RPL26P30	ENSG00000236264	transcribed_processed_pseudogene	0.449219	3.003*10^-9
MRPL40	ENSG00000185608	protein_coding	0.440031	6.760*10^-9
PYM1	ENSG00000170473	protein_coding	0.414876	5.441*10^-8
YWHAE	ENSG00000108953	protein_coding	0.46723	5.483*10^-10
C18orf21	ENSG00000141428	protein_coding	0.409767	8.138*10^-8
FLAD1	ENSG00000160688	protein_coding	0.474735	2.529*10^-10
RNF181	ENSG00000168894	protein_coding	0.610218	0.000*10^+0
NUDT1	ENSG00000106268	protein_coding	0.503933	6.928*10^-13
ISY1	ENSG00000240682	protein_coding	0.41062	7.613*10^-8
AURKAIP1	ENSG00000175756	protein_coding	0.433127	1.220*10^-8
KIAA1109	ENSG00000138688	protein_coding	-0.410464	7.706*10^-8
GADD45GIP1	ENSG00000179271	protein_coding	0.42906	1.717*10^-8
CETN3	ENSG00000153140	protein_coding	0.517828	0.000*10^+0
EMC9	ENSG00000100908	protein_coding	0.430144	1.568*10^-8
COX5B	ENSG00000135940	protein_coding	0.46806	5.046*10^-10
SNRPD2	ENSG00000125743	protein_coding	0.538487	0.000*10^+0
FDX2	ENSG00000267673	protein_coding	0.511286	0.000*10^+0
HMGB3P6	ENSG00000213070	processed_pseudogene	0.447281	2.416*10^-9
NDUFS8	ENSG00000110717	protein_coding	0.400334	1.682*10^-7
PAFAH1B3	ENSG00000079462	protein_coding	0.469804	4.229*10^-10
RBIS	ENSG00000176731	protein_coding	0.562956	0.000*10^+0
PPIAP14	ENSG00000264775	processed_pseudogene	0.405203	1.160*10^-7
PRR19	ENSG00000188368	protein_coding	0.412327	6.657*10^-8
HECTD4	ENSG00000173064	protein_coding	-0.438115	7.977*10^-9
TEX30	ENSG00000151287	protein_coding	0.426415	2.138*10^-8
MRM2	ENSG00000122687	protein_coding	0.409313	8.432*10^-8
PSMA7	ENSG00000101182	protein_coding	0.476034	2.200*10^-10
BNIP1	ENSG00000113734	protein_coding	0.411368	7.179*10^-8
H2AC16	ENSG00000276903	protein_coding	0.4079	7.136*10^-8
RPL26L1	ENSG00000037241	protein_coding	0.496571	1.368*10^-11
AHNAK	ENSG00000124942	protein_coding	-0.428396	1.814*10^-8
METTL5	ENSG00000138382	protein_coding	0.591888	0.000*10^+0
POP5	ENSG00000167272	protein_coding	0.433579	1.175*10^-8
APOO	ENSG00000184831	protein_coding	0.422494	2.948*10^-8
IMMP1L	ENSG00000148950	protein_coding	0.418864	3.955*10^-8
ZNHIT3	ENSG00000273611	protein_coding	0.41692	4.623*10^-8
SCNM1	ENSG00000163156	protein_coding	0.701999	0.000*10^+0
ATP5PF	ENSG00000154723	protein_coding	0.424371	2.529*10^-8
ZNF205	ENSG00000122386	protein_coding	0.423155	2.794*10^-8
NGDN	ENSG00000129460	protein_coding	0.444282	4.662*10^-9
SMIM26	ENSG00000232388	protein_coding	0.44547	4.197*10^-9
CHEK2	ENSG00000183765	protein_coding	0.41242	6.608*10^-8
HSD17B10	ENSG00000072506	protein_coding	0.504305	3.165*10^-13
RPS7P10	ENSG00000226525	processed_pseudogene	0.455705	1.660*10^-9
RNF7	ENSG00000114125	protein_coding	0.475831	2.249*10^-10
CENPH	ENSG00000153044	protein_coding	0.432941	1.240*10^-8
METTL18	ENSG00000171806	protein_coding	0.473939	2.753*10^-10
ACTL6A	ENSG00000136518	protein_coding	0.420809	3.381*10^-8
SNRPA	ENSG00000077312	protein_coding	0.575799	0.000*10^+0
SNRPEP4	ENSG00000233270	processed_pseudogene	0.47346	2.896*10^-10
ASB3	ENSG00000115239	protein_coding	0.587064	0.000*10^+0
PFDN2	ENSG00000143256	protein_coding	0.595295	0.000*10^+0
CSNK2B	ENSG00000204435	protein_coding	0.536556	0.000*10^+0
ELOC	ENSG00000154582	protein_coding	0.537059	0.000*10^+0
AC005261.5	ENSG00000279541	TEC	-0.44017	6.680*10^-9
UQCRH	ENSG00000173660	protein_coding	0.476686	2.049*10^-10
USP39	ENSG00000168883	protein_coding	0.45555	1.684*10^-9
CCT8	ENSG00000156261	protein_coding	0.479108	1.567*10^-10
GAR1	ENSG00000109534	protein_coding	0.403876	1.284*10^-7
CCT7	ENSG00000135624	protein_coding	0.544982	0.000*10^+0
TMEM14C	ENSG00000111843	protein_coding	0.442532	5.437*10^-9
RPS21	ENSG00000171858	protein_coding	0.401119	1.585*10^-7
TBC1D7	ENSG00000145979	protein_coding	0.447415	3.531*10^-9
PAK1IP1	ENSG00000111845	protein_coding	0.43722	8.615*10^-9
SPC24	ENSG00000161888	protein_coding	0.503775	8.587*10^-13
NR2C2AP	ENSG00000184162	protein_coding	0.439334	7.181*10^-9
DNAJC19P9	ENSG00000258608	processed_pseudogene	0.450015	2.795*10^-9
FAM136A	ENSG00000035141	protein_coding	0.427154	2.011*10^-8
YIF1B	ENSG00000167645	protein_coding	0.417541	4.399*10^-8
TSEN34	ENSG00000170892	protein_coding	0.4026	1.416*10^-7
DYNLRB1	ENSG00000125971	protein_coding	0.505781	0.000*10^+0
EXOSC1	ENSG00000171311	protein_coding	0.52718	0.000*10^+0
SNRPD1	ENSG00000167088	protein_coding	0.485456	7.379*10^-11
THOC7	ENSG00000163634	protein_coding	0.421871	3.102*10^-8
S100A13	ENSG00000189171	protein_coding	0.416155	4.914*10^-8
DCHS1	ENSG00000166341	protein_coding	-0.403286	1.343*10^-7
FAM104B	ENSG00000182518	protein_coding	0.4919	3.049*10^-11
NDUFA12	ENSG00000184752	protein_coding	0.482771	1.025*10^-10
DNAJC19	ENSG00000205981	protein_coding	0.472122	3.332*10^-10
NASP	ENSG00000132780	protein_coding	0.408361	9.080*10^-8
SLC4A1AP	ENSG00000163798	protein_coding	0.533889	0.000*10^+0
TMEM69	ENSG00000159596	protein_coding	0.472638	3.157*10^-10
SNRPD3	ENSG00000100028	protein_coding	0.520995	0.000*10^+0
SNRPGP2	ENSG00000264350	processed_pseudogene	0.58289	0.000*10^+0
BANF1P3	ENSG00000237758	processed_pseudogene	0.411568	7.066*10^-8
RANGRF	ENSG00000108961	protein_coding	0.415009	5.384*10^-8
RPL7P9	ENSG00000137970	processed_pseudogene	0.443289	5.088*10^-9
RPL31	ENSG00000071082	protein_coding	0.481284	1.221*10^-10
COA6	ENSG00000168275	protein_coding	0.447102	3.631*10^-9
INO80B	ENSG00000115274	protein_coding	0.539351	0.000*10^+0
TRAPPC3	ENSG00000054116	protein_coding	0.407676	9.577*10^-8
MRPS28	ENSG00000147586	protein_coding	0.424558	2.491*10^-8
GEMIN6	ENSG00000152147	protein_coding	0.598163	0.000*10^+0
HDDC2	ENSG00000111906	protein_coding	0.471684	3.486*10^-10
BCAP31	ENSG00000185825	protein_coding	0.459722	1.138*10^-9
NAXE	ENSG00000163382	protein_coding	0.460507	1.056*10^-9
ZCRB1	ENSG00000139168	protein_coding	0.512463	0.000*10^+0
EIF2AK1	ENSG00000086232	protein_coding	0.407963	9.366*10^-8
PSRC1	ENSG00000134222	protein_coding	0.428967	1.730*10^-8
MRPS9	ENSG00000135972	protein_coding	0.454175	1.912*10^-9
RNASEH2A	ENSG00000104889	protein_coding	0.494609	1.966*10^-11
GPN1	ENSG00000198522	protein_coding	0.506682	0.000*10^+0
C12orf45	ENSG00000151131	protein_coding	0.507794	0.000*10^+0
LRRC45	ENSG00000169683	protein_coding	0.426265	2.164*10^-8
UQCRHL	ENSG00000233954	protein_coding	0.409033	8.617*10^-8
PIN4	ENSG00000102309	protein_coding	0.52994	0.000*10^+0
MRPL51	ENSG00000111639	protein_coding	0.538233	0.000*10^+0
EIF2B4	ENSG00000115211	protein_coding	0.493712	2.288*10^-11
TMEM14B	ENSG00000137210	protein_coding	0.478532	1.671*10^-10
MYO18A	ENSG00000196535	protein_coding	-0.406168	1.076*10^-7
PSMD10	ENSG00000101843	protein_coding	0.438868	7.476*10^-9
GLRX5	ENSG00000182512	protein_coding	0.428941	1.734*10^-8
BMP2K	ENSG00000138756	protein_coding	-0.503727	9.098*10^-13
AC026271.1	ENSG00000174977	processed_pseudogene	0.445095	4.339*10^-9
MRPL53	ENSG00000204822	protein_coding	0.485436	7.398*10^-11
WDR74	ENSG00000133316	protein_coding	0.454971	1.777*10^-9
NHSL2	ENSG00000204131	protein_coding	-0.437	8.779*10^-9
NAA38	ENSG00000183011	protein_coding	0.48794	5.350*10^-11
SGF29	ENSG00000176476	protein_coding	0.417329	4.474*10^-8
CNIH4	ENSG00000143771	protein_coding	0.404009	1.271*10^-7
SF3B6	ENSG00000115128	protein_coding	0.750156	0.000*10^+0
TRIAP1	ENSG00000170855	protein_coding	0.47668	2.050*10^-10
ELOB	ENSG00000103363	protein_coding	0.48757	5.620*10^-11
HAX1	ENSG00000143575	protein_coding	0.464757	7.002*10^-10
NDUFB8	ENSG00000166136	protein_coding	0.470078	4.113*10^-10
GMPSP1	ENSG00000250471	processed_pseudogene	0.568108	0.000*10^+0
TRIR	ENSG00000123144	protein_coding	0.434369	1.099*10^-8
CUTA	ENSG00000112514	protein_coding	0.404833	1.193*10^-7
PET100	ENSG00000229833	protein_coding	0.447593	3.475*10^-9
COPS5	ENSG00000121022	protein_coding	0.419773	3.676*10^-8
CDC20	ENSG00000117399	protein_coding	0.404994	1.178*10^-7
PLEKHG1	ENSG00000120278	protein_coding	-0.402623	1.413*10^-7
HERC1	ENSG00000103657	protein_coding	-0.513146	0.000*10^+0
HNRNPCL2	ENSG00000275774	protein_coding	0.408867	6.600*10^-8
EDA2R	ENSG00000131080	protein_coding	-0.414532	5.592*10^-8
NDUFB3	ENSG00000119013	protein_coding	0.443339	5.066*10^-9
AUP1	ENSG00000115307	protein_coding	0.4309	1.472*10^-8
ATP5MF	ENSG00000241468	protein_coding	0.423231	2.776*10^-8
MALSU1	ENSG00000156928	protein_coding	0.550486	0.000*10^+0
TFAP4	ENSG00000090447	protein_coding	0.46003	1.105*10^-9
LSM2	ENSG00000204392	protein_coding	0.523434	0.000*10^+0
PPP1R14BP3	ENSG00000179967	processed_pseudogene	0.409465	8.332*10^-8
BABAM2	ENSG00000158019	protein_coding	0.424848	2.432*10^-8
TACC3	ENSG00000013810	protein_coding	0.408342	9.094*10^-8
MRPL24	ENSG00000143314	protein_coding	0.446563	3.809*10^-9
TSR2	ENSG00000158526	protein_coding	0.456067	1.605*10^-9
NACA	ENSG00000196531	protein_coding	0.493466	2.382*10^-11
FUS	ENSG00000089280	protein_coding	0.428557	1.790*10^-8
CENPX	ENSG00000169689	protein_coding	0.488216	5.156*10^-11
EEF1E1	ENSG00000124802	protein_coding	0.470259	4.037*10^-10
PTMAP4	ENSG00000231503	processed_pseudogene	0.406394	1.058*10^-7
RPS20	ENSG00000008988	protein_coding	0.442603	5.404*10^-9
CCDC59	ENSG00000133773	protein_coding	0.465666	6.403*10^-10
PA2G4	ENSG00000170515	protein_coding	0.495044	1.821*10^-11
DYNLL1	ENSG00000088986	protein_coding	0.410786	7.514*10^-8
RANBP1	ENSG00000099901	protein_coding	0.470962	3.757*10^-10
PIK3CG	ENSG00000105851	protein_coding	-0.452998	2.131*10^-9
PQBP1	ENSG00000102103	protein_coding	0.453871	1.967*10^-9
PDCL3	ENSG00000115539	protein_coding	0.479396	1.516*10^-10
CCDC167	ENSG00000198937	protein_coding	0.437291	8.563*10^-9
DRG1	ENSG00000185721	protein_coding	0.432808	1.254*10^-8
CFAP20	ENSG00000070761	protein_coding	0.438866	7.478*10^-9
AFF4	ENSG00000072364	protein_coding	-0.467961	5.096*10^-10
NME1	ENSG00000239672	protein_coding	0.516708	0.000*10^+0
TMEM9	ENSG00000116857	protein_coding	0.400698	1.636*10^-7
TMEM186	ENSG00000184857	protein_coding	0.422853	2.863*10^-8
HERC3	ENSG00000138641	protein_coding	-0.417555	4.394*10^-8
HNRNPC	ENSG00000092199	protein_coding	0.541047	0.000*10^+0
LAS1L	ENSG00000001497	protein_coding	0.417366	4.461*10^-8
ROMO1	ENSG00000125995	protein_coding	0.454322	1.886*10^-9
COX7A2L	ENSG00000115944	protein_coding	0.567735	0.000*10^+0
MED19	ENSG00000156603	protein_coding	0.523129	0.000*10^+0
MTUS1	ENSG00000129422	protein_coding	-0.444361	4.630*10^-9
H2BC13	ENSG00000185130	protein_coding	0.41248	6.577*10^-8
POLR2K	ENSG00000147669	protein_coding	0.543328	0.000*10^+0
MLF2	ENSG00000089693	protein_coding	0.415045	5.368*10^-8
TMEM39B	ENSG00000121775	protein_coding	0.406578	1.043*10^-7
H2AZ1	ENSG00000164032	protein_coding	0.453292	2.074*10^-9
ACBD6	ENSG00000230124	protein_coding	0.44214	5.627*10^-9
PARK7	ENSG00000116288	protein_coding	0.47552	2.325*10^-10
ZNHIT2	ENSG00000174276	protein_coding	0.486119	6.785*10^-11
MEN1	ENSG00000133895	protein_coding	0.40782	9.471*10^-8
CKS2	ENSG00000123975	protein_coding	0.465582	6.457*10^-10
PPIH	ENSG00000171960	protein_coding	0.583073	0.000*10^+0
MAGOH	ENSG00000162385	protein_coding	0.57108	0.000*10^+0
CHCHD2	ENSG00000106153	protein_coding	0.413208	6.210*10^-8
PCLAF	ENSG00000166803	protein_coding	0.407613	9.624*10^-8
PYURF	ENSG00000145337	protein_coding	0.403348	1.337*10^-7
MRPL11	ENSG00000174547	protein_coding	0.481831	1.145*10^-10
COX7B	ENSG00000131174	protein_coding	0.404675	1.208*10^-7
ATP5MFP5	ENSG00000256103	processed_pseudogene	0.450921	2.575*10^-9
MRPS15	ENSG00000116898	protein_coding	0.555875	0.000*10^+0
EXOSC5	ENSG00000077348	protein_coding	0.460292	1.078*10^-9
RIDA	ENSG00000132541	protein_coding	0.48313	9.819*10^-11
TLN1	ENSG00000137076	protein_coding	-0.404068	1.265*10^-7
NOL7	ENSG00000225921	protein_coding	0.423008	2.827*10^-8
MRPL28	ENSG00000086504	protein_coding	0.44842	3.227*10^-9
RFC4	ENSG00000163918	protein_coding	0.44162	5.888*10^-9
MRPL15	ENSG00000137547	protein_coding	0.441256	6.078*10^-9
TSFM	ENSG00000123297	protein_coding	0.503828	8.020*10^-13
AL663058.1	ENSG00000225486	processed_pseudogene	0.497522	1.636*10^-11
RAD54B	ENSG00000197275	protein_coding	0.42351	2.714*10^-8
TMEM256	ENSG00000205544	protein_coding	0.425354	2.333*10^-8
MRPL58	ENSG00000167862	protein_coding	0.417103	4.556*10^-8
SMUG1	ENSG00000123415	protein_coding	0.452315	2.268*10^-9
TRIP13	ENSG00000071539	protein_coding	0.424072	2.592*10^-8
SEL1L	ENSG00000071537	protein_coding	-0.454938	1.782*10^-9
RPL27A	ENSG00000166441	protein_coding	0.418286	4.144*10^-8
WDR92	ENSG00000243667	protein_coding	0.409163	8.531*10^-8
NDUFAB1	ENSG00000004779	protein_coding	0.455104	1.755*10^-9
ATP5ME	ENSG00000169020	protein_coding	0.402081	1.473*10^-7
ADRM1	ENSG00000130706	protein_coding	0.451937	2.348*10^-9
SNRNP27	ENSG00000124380	protein_coding	0.485862	7.010*10^-11
PTRHD1	ENSG00000184924	protein_coding	0.562144	0.000*10^+0
RPS15AP38	ENSG00000237668	processed_pseudogene	0.410939	7.425*10^-8
PSMD14	ENSG00000115233	protein_coding	0.440678	6.392*10^-9
MPHOSPH10	ENSG00000124383	protein_coding	0.41887	3.953*10^-8
MYL6B	ENSG00000196465	protein_coding	0.437451	8.445*10^-9
ELP5	ENSG00000170291	protein_coding	0.41316	6.233*10^-8
RPL5	ENSG00000122406	protein_coding	0.407695	9.563*10^-8
HDAC8	ENSG00000147099	protein_coding	0.402152	1.465*10^-7
JAK1	ENSG00000162434	protein_coding	-0.404187	1.254*10^-7
PCBP2	ENSG00000197111	protein_coding	0.444579	4.542*10^-9
ATRAID	ENSG00000138085	protein_coding	0.625997	0.000*10^+0
ERI3	ENSG00000117419	protein_coding	0.426782	2.074*10^-8
UNC50	ENSG00000115446	protein_coding	0.406702	1.033*10^-7
MAD2L2	ENSG00000116670	protein_coding	0.440243	6.637*10^-9
RAPGEF2	ENSG00000109756	protein_coding	-0.418661	4.020*10^-8
H2AX	ENSG00000188486	protein_coding	0.431597	1.388*10^-8
LSM3	ENSG00000170860	protein_coding	0.44531	4.258*10^-9
EXOSC4	ENSG00000178896	protein_coding	0.402332	1.445*10^-7
MRPS21	ENSG00000266472	protein_coding	0.52631	0.000*10^+0
NUBP2	ENSG00000095906	protein_coding	0.417281	4.491*10^-8
POLE4	ENSG00000115350	protein_coding	0.463778	7.706*10^-10
SF3A3	ENSG00000183431	protein_coding	0.450221	2.744*10^-9
SNRPA1	ENSG00000131876	protein_coding	0.422269	3.003*10^-8
CEBPZOS	ENSG00000218739	protein_coding	0.441172	6.123*10^-9
SERF1A	ENSG00000172058	protein_coding	0.411156	5.482*10^-8
STMN1	ENSG00000117632	protein_coding	0.532977	0.000*10^+0
ENY2	ENSG00000120533	protein_coding	0.440316	6.595*10^-9
GCSH	ENSG00000140905	protein_coding	0.402812	1.393*10^-7
H3C12	ENSG00000197153	protein_coding	0.421116	2.403*10^-8
CHTF18	ENSG00000127586	protein_coding	0.416852	4.648*10^-8
ILF2	ENSG00000143621	protein_coding	0.559863	0.000*10^+0
CDC42BPB	ENSG00000198752	protein_coding	-0.435871	9.669*10^-9
PSMB4	ENSG00000159377	protein_coding	0.561091	0.000*10^+0
UBE2C	ENSG00000175063	protein_coding	0.55354	0.000*10^+0
NPM3	ENSG00000107833	protein_coding	0.444624	4.524*10^-9
NFU1	ENSG00000169599	protein_coding	0.429909	1.599*10^-8
DGUOK	ENSG00000114956	protein_coding	0.725393	0.000*10^+0
CENPW	ENSG00000203760	protein_coding	0.512152	0.000*10^+0
LSM4	ENSG00000130520	protein_coding	0.528631	0.000*10^+0
TIMM8A	ENSG00000126953	protein_coding	0.418664	4.020*10^-8
RAB13	ENSG00000143545	protein_coding	0.458223	1.311*10^-9
SRP14	ENSG00000140319	protein_coding	0.448635	3.165*10^-9
CACYBP	ENSG00000116161	protein_coding	0.498618	8.781*10^-12
RBMX	ENSG00000147274	protein_coding	0.400839	1.619*10^-7
MDH1	ENSG00000014641	protein_coding	0.575915	0.000*10^+0
THOC6	ENSG00000131652	protein_coding	0.430499	1.522*10^-8
MRPL36	ENSG00000171421	protein_coding	0.432103	1.331*10^-8
FAM220A	ENSG00000178397	protein_coding	0.437293	8.561*10^-9
EIPR1	ENSG00000032389	protein_coding	0.456767	1.503*10^-9
TMEM18	ENSG00000151353	protein_coding	0.53381	0.000*10^+0
FAM241B	ENSG00000171224	protein_coding	0.452473	2.235*10^-9
SVBP	ENSG00000177868	protein_coding	0.454096	1.926*10^-9
RPS27AP16	ENSG00000224631	transcribed_processed_pseudogene	0.4629	8.391*10^-10
BRIX1	ENSG00000113460	protein_coding	0.513487	0.000*10^+0
NDUFS6	ENSG00000145494	protein_coding	0.431247	1.430*10^-8
NELFE	ENSG00000204356	protein_coding	0.466536	5.875*10^-10
SNRPGP10	ENSG00000235363	processed_pseudogene	0.6477	0.000*10^+0
TYMS	ENSG00000176890	protein_coding	0.417589	4.382*10^-8
SPINDOC	ENSG00000168005	protein_coding	0.452013	2.331*10^-9
AKAP13	ENSG00000170776	protein_coding	-0.566194	0.000*10^+0
TBCB	ENSG00000105254	protein_coding	0.441064	6.180*10^-9
PSMA1	ENSG00000129084	protein_coding	0.414388	5.656*10^-8
AL049873.1	ENSG00000213598	processed_pseudogene	0.416482	4.788*10^-8
TROAP	ENSG00000135451	protein_coding	0.446213	3.930*10^-9
AC006511.3	ENSG00000279865	TEC	0.441668	5.863*10^-9
METTL26	ENSG00000130731	protein_coding	0.49822	9.641*10^-12
CBY1	ENSG00000100211	protein_coding	0.416733	4.693*10^-8
ZMYND19	ENSG00000165724	protein_coding	0.415175	5.313*10^-8
AL356653.1	ENSG00000233514	processed_pseudogene	0.452905	2.149*10^-9
MAGOHB	ENSG00000111196	protein_coding	0.451756	2.387*10^-9
PNO1	ENSG00000115946	protein_coding	0.458353	1.296*10^-9
SRSF3	ENSG00000112081	protein_coding	0.490813	3.585*10^-11
PPM1G	ENSG00000115241	protein_coding	0.520617	0.000*10^+0
SURF2	ENSG00000148291	protein_coding	0.47707	1.965*10^-10
RAD51AP1	ENSG00000111247	protein_coding	0.41607	4.948*10^-8
GTF2H5	ENSG00000272047	protein_coding	0.460732	1.034*10^-9
EMG1	ENSG00000126749	protein_coding	0.482802	1.021*10^-10
SUSD6	ENSG00000100647	protein_coding	-0.441282	6.064*10^-9
SNAPIN	ENSG00000143553	protein_coding	0.435772	9.751*10^-9
AC012158.1	ENSG00000243024	transcribed_processed_pseudogene	0.418314	4.134*10^-8
NTHL1	ENSG00000065057	protein_coding	0.537861	0.000*10^+0
TPRKB	ENSG00000144034	protein_coding	0.673919	0.000*10^+0
CDKN3	ENSG00000100526	protein_coding	0.434993	1.042*10^-8
PDZD11	ENSG00000120509	protein_coding	0.512669	0.000*10^+0
RBX1	ENSG00000100387	protein_coding	0.444892	4.418*10^-9
SNRPFP1	ENSG00000231878	processed_pseudogene	0.465791	6.325*10^-10
CDT1	ENSG00000167513	protein_coding	0.403667	1.305*10^-7
PTTG1	ENSG00000164611	protein_coding	0.603845	0.000*10^+0
RPL6P27	ENSG00000235552	transcribed_processed_pseudogene	0.425165	2.370*10^-8
COMMD1	ENSG00000173163	protein_coding	0.533133	0.000*10^+0
NDUFAF7	ENSG00000003509	protein_coding	0.426821	2.067*10^-8
CCNB2	ENSG00000157456	protein_coding	0.402476	1.429*10^-7
MRPL18	ENSG00000112110	protein_coding	0.546215	0.000*10^+0
AC024293.1	ENSG00000244313	processed_pseudogene	0.414842	5.456*10^-8
RPL36A	ENSG00000241343	protein_coding	0.466781	5.734*10^-10
TMEM258	ENSG00000134825	protein_coding	0.448479	3.210*10^-9
PCGF6	ENSG00000156374	protein_coding	0.452713	2.187*10^-9
AL109810.1	ENSG00000229595	processed_pseudogene	0.400962	1.240*10^-7
CRYBG3	ENSG00000080200	protein_coding	-0.420123	3.573*10^-8
SETX	ENSG00000107290	protein_coding	-0.423211	2.781*10^-8
CKS1BP3	ENSG00000268942	processed_pseudogene	0.413233	6.197*10^-8
NMRAL1	ENSG00000153406	protein_coding	0.52388	0.000*10^+0
RPS7	ENSG00000171863	protein_coding	0.590353	0.000*10^+0
FIBP	ENSG00000172500	protein_coding	0.434519	1.085*10^-8
NDUFS5	ENSG00000168653	protein_coding	0.558161	0.000*10^+0
NUTF2	ENSG00000102898	protein_coding	0.415506	5.175*10^-8
CAMTA1	ENSG00000171735	protein_coding	0.466482	5.907*10^-10
PSMB1	ENSG00000008018	protein_coding	0.511249	0.000*10^+0
SLIRP	ENSG00000119705	protein_coding	0.469446	4.386*10^-10
ERH	ENSG00000100632	protein_coding	0.498711	8.586*10^-12
ARL6IP4	ENSG00000182196	protein_coding	0.431609	1.387*10^-8
COX6A1	ENSG00000111775	protein_coding	0.465943	6.231*10^-10
METAP2	ENSG00000111142	protein_coding	0.417628	4.368*10^-8
SUMO1	ENSG00000116030	protein_coding	0.519926	0.000*10^+0
BOLA3	ENSG00000163170	protein_coding	0.573674	0.000*10^+0
AAAS	ENSG00000094914	protein_coding	0.424352	2.533*10^-8
DCXR	ENSG00000169738	protein_coding	0.454983	1.775*10^-9
TMA7	ENSG00000232112	protein_coding	0.438854	7.485*10^-9
MRPL20	ENSG00000242485	protein_coding	0.414695	5.520*10^-8
RPL31P49	ENSG00000241680	processed_pseudogene	0.436887	8.864*10^-9
ZNF692	ENSG00000171163	protein_coding	0.404147	1.258*10^-7
C16orf91	ENSG00000174109	protein_coding	0.430067	1.578*10^-8
TSTD2	ENSG00000136925	protein_coding	-0.414303	5.694*10^-8
MRPS23	ENSG00000181610	protein_coding	0.404263	1.246*10^-7
BRAT1	ENSG00000106009	protein_coding	0.40533	1.148*10^-7
SNRK	ENSG00000163788	protein_coding	-0.420276	3.530*10^-8
FKBP2	ENSG00000173486	protein_coding	0.420693	3.412*10^-8
CDK1	ENSG00000170312	protein_coding	0.415534	5.164*10^-8
ACYP2	ENSG00000170634	protein_coding	0.404393	1.234*10^-7
MEMO1	ENSG00000162959	protein_coding	0.448389	3.236*10^-9
RNPS1	ENSG00000205937	protein_coding	0.404091	1.263*10^-7
GINS2	ENSG00000131153	protein_coding	0.461808	9.324*10^-10
PSMA4	ENSG00000041357	protein_coding	0.483869	8.979*10^-11
RAPH1	ENSG00000173166	protein_coding	-0.487327	5.802*10^-11
PIMREG	ENSG00000129195	protein_coding	0.413981	5.841*10^-8
CHCHD1	ENSG00000172586	protein_coding	0.525235	0.000*10^+0
PIGC	ENSG00000135845	protein_coding	0.439354	7.169*10^-9
PTPMT1	ENSG00000110536	protein_coding	0.509053	0.000*10^+0
RPL27AP	ENSG00000215467	processed_pseudogene	0.44704	3.651*10^-9
CPSF3	ENSG00000119203	protein_coding	0.523268	0.000*10^+0
RBMX2	ENSG00000134597	protein_coding	0.525966	0.000*10^+0
AC023055.1	ENSG00000257390	protein_coding	0.404819	1.194*10^-7
GEMIN2	ENSG00000092208	protein_coding	0.405624	1.123*10^-7
MEA1	ENSG00000124733	protein_coding	0.431795	1.366*10^-8
POLR2G	ENSG00000168002	protein_coding	0.45231	2.269*10^-9
PTPN21	ENSG00000070778	protein_coding	-0.416527	4.770*10^-8
PA2G4P1	ENSG00000237828	processed_pseudogene	0.409976	8.006*10^-8
SWI5	ENSG00000175854	protein_coding	0.40205	1.476*10^-7
FEM1C	ENSG00000145780	protein_coding	-0.401319	1.561*10^-7
FBL	ENSG00000105202	protein_coding	0.411684	7.002*10^-8
SAC3D1	ENSG00000168061	protein_coding	0.500958	4.517*10^-12
HSPB11	ENSG00000081870	protein_coding	0.501251	4.067*10^-12
TIMM23	ENSG00000265354	protein_coding	0.481267	1.224*10^-10
VBP1	ENSG00000155959	protein_coding	0.46546	6.535*10^-10
AL354707.2	ENSG00000232946	processed_pseudogene	0.483216	7.375*10^-11
MRPL13	ENSG00000172172	protein_coding	0.483438	9.462*10^-11
SCAND1	ENSG00000171222	protein_coding	0.402025	1.479*10^-7
RTL8A	ENSG00000203950	protein_coding	0.426745	2.080*10^-8
SOX3	ENSG00000134595	protein_coding	0.418787	2.922*10^-8
RPS7P1	ENSG00000263266	processed_pseudogene	0.519931	0.000*10^+0
MRPL57	ENSG00000173141	protein_coding	0.404627	1.212*10^-7
KRTCAP2	ENSG00000163463	protein_coding	0.458819	1.240*10^-9
HDGF	ENSG00000143321	protein_coding	0.414368	5.665*10^-8
MTX2	ENSG00000128654	protein_coding	0.475664	2.289*10^-10
YBX1	ENSG00000065978	protein_coding	0.444011	4.775*10^-9
SELENOH	ENSG00000211450	protein_coding	0.45953	1.159*10^-9
SUB1	ENSG00000113387	protein_coding	0.402188	1.461*10^-7
NUF2	ENSG00000143228	protein_coding	0.430273	1.551*10^-8
SNRNP25	ENSG00000161981	protein_coding	0.515254	0.000*10^+0
VPS72	ENSG00000163159	protein_coding	0.641448	0.000*10^+0
HAUS1	ENSG00000152240	protein_coding	0.410662	7.587*10^-8
RPF1	ENSG00000117133	protein_coding	0.432554	1.281*10^-8
METTL1	ENSG00000037897	protein_coding	0.400467	1.665*10^-7
CCDC43	ENSG00000180329	protein_coding	0.434253	1.110*10^-8
CETN2	ENSG00000147400	protein_coding	0.449806	2.848*10^-9
NOP58	ENSG00000055044	protein_coding	0.437923	8.110*10^-9
UBE2T	ENSG00000077152	protein_coding	0.539376	0.000*10^+0
C12orf73	ENSG00000204954	protein_coding	0.49037	3.822*10^-11
GGCT	ENSG00000006625	protein_coding	0.53742	0.000*10^+0
RPS7P4	ENSG00000229133	processed_pseudogene	0.46642	5.943*10^-10
HIKESHI	ENSG00000149196	protein_coding	0.420434	3.485*10^-8
MTERF3	ENSG00000156469	protein_coding	0.45592	1.627*10^-9
MORN2	ENSG00000188010	protein_coding	0.611525	0.000*10^+0
ATP5PD	ENSG00000167863	protein_coding	0.461876	9.264*10^-10
HSPE1P6	ENSG00000232917	processed_pseudogene	0.432687	1.267*10^-8
GGH	ENSG00000137563	protein_coding	0.429836	1.609*10^-8
KIAA0513	ENSG00000135709	protein_coding	-0.471269	3.639*10^-10
SECISBP2L	ENSG00000138593	protein_coding	-0.508655	0.000*10^+0
TIMM17B	ENSG00000126768	protein_coding	0.425162	2.370*10^-8
PPIAP44	ENSG00000258118	processed_pseudogene	0.411209	5.458*10^-8
NPM1P46	ENSG00000213104	processed_pseudogene	0.406476	1.051*10^-7
SLC4A1APP1	ENSG00000232060	processed_pseudogene	0.460459	1.061*10^-9
HPRT1	ENSG00000165704	protein_coding	0.462629	8.614*10^-10
NDUFB4	ENSG00000065518	protein_coding	0.474408	2.619*10^-10
SRSF7	ENSG00000115875	protein_coding	0.539018	0.000*10^+0
GNL2	ENSG00000134697	protein_coding	0.429788	1.616*10^-8
HSPG2	ENSG00000142798	protein_coding	-0.453326	2.068*10^-9
NUDCD2	ENSG00000170584	protein_coding	0.454799	1.805*10^-9
MRPL33	ENSG00000243147	protein_coding	0.463482	7.931*10^-10
PSMB3	ENSG00000277791	protein_coding	0.420327	3.515*10^-8
TSTD1	ENSG00000215845	protein_coding	0.408076	9.284*10^-8
DUSP23	ENSG00000158716	protein_coding	0.463095	8.234*10^-10
ATP5MD	ENSG00000173915	protein_coding	0.483	9.973*10^-11
TRIT1	ENSG00000043514	protein_coding	0.472841	3.090*10^-10
COPS9	ENSG00000172428	protein_coding	0.441764	5.814*10^-9
EXOSC3	ENSG00000107371	protein_coding	0.444996	4.377*10^-9
CMSS1	ENSG00000184220	protein_coding	0.453639	2.009*10^-9
XCR1	ENSG00000173578	protein_coding	-0.412131	5.062*10^-8
AC104339.1	ENSG00000233778	processed_pseudogene	0.42119	3.278*10^-8
BLOC1S1	ENSG00000135441	protein_coding	0.417495	4.415*10^-8
NPM1	ENSG00000181163	protein_coding	0.48278	1.024*10^-10
PMF1	ENSG00000160783	protein_coding	0.513061	0.000*10^+0
NDUFAF8	ENSG00000224877	protein_coding	0.428538	1.793*10^-8
MIS18A	ENSG00000159055	protein_coding	0.568382	0.000*10^+0
C1D	ENSG00000197223	protein_coding	0.569313	0.000*10^+0
FAAP24	ENSG00000131944	protein_coding	0.408601	8.912*10^-8
RPS7P8	ENSG00000213183	processed_pseudogene	0.409474	8.326*10^-8
MRPS17	ENSG00000239789	protein_coding	0.436348	9.283*10^-9
H4C5	ENSG00000276966	protein_coding	0.435628	9.871*10^-9
SLMAP	ENSG00000163681	protein_coding	-0.475613	2.302*10^-10
UQCC2	ENSG00000137288	protein_coding	0.482215	1.095*10^-10
RPL35A	ENSG00000182899	protein_coding	0.486723	6.278*10^-11
MPV17	ENSG00000115204	protein_coding	0.537906	0.000*10^+0
BCYRN1	ENSG00000236824	scRNA	0.432515	1.285*10^-8
MRPL43	ENSG00000055950	protein_coding	0.40647	1.051*10^-7
SUPT4H1	ENSG00000213246	protein_coding	0.400331	1.683*10^-7
FYCO1	ENSG00000163820	protein_coding	-0.435749	9.769*10^-9
ACP1	ENSG00000143727	protein_coding	0.513532	0.000*10^+0
RPL30	ENSG00000156482	protein_coding	0.432374	1.301*10^-8
RPS27AP5	ENSG00000231767	protein_coding	0.444725	4.483*10^-9
RPL6	ENSG00000089009	protein_coding	0.41312	6.253*10^-8
RBM8A	ENSG00000265241	protein_coding	0.426246	2.168*10^-8
ATP5MC2	ENSG00000135390	protein_coding	0.488453	4.993*10^-11
MRPS34	ENSG00000074071	protein_coding	0.466719	5.769*10^-10
MIIP	ENSG00000116691	protein_coding	0.408562	8.940*10^-8
AC116533.1	ENSG00000244398	processed_pseudogene	0.416084	4.942*10^-8
TRPT1	ENSG00000149743	protein_coding	0.406168	1.076*10^-7
ANAPC16	ENSG00000166295	protein_coding	0.401711	1.515*10^-7
DUSP12	ENSG00000081721	protein_coding	0.494231	2.098*10^-11
AC087477.1	ENSG00000242295	processed_pseudogene	0.460873	6.768*10^-10
NIT2	ENSG00000114021	protein_coding	0.405155	1.164*10^-7
MED30	ENSG00000164758	protein_coding	0.482896	1.010*10^-10
COX6C	ENSG00000164919	protein_coding	0.408167	9.219*10^-8
RPP21	ENSG00000241370	protein_coding	0.471645	3.501*10^-10
SMN1	ENSG00000172062	protein_coding	0.448299	3.262*10^-9
VKORC1	ENSG00000167397	protein_coding	0.436622	9.068*10^-9
TXNDC12	ENSG00000117862	protein_coding	0.526779	0.000*10^+0
WDR54	ENSG00000005448	protein_coding	0.446966	3.675*10^-9
MSH2	ENSG00000095002	protein_coding	0.437189	8.638*10^-9
STAMBP	ENSG00000124356	protein_coding	0.433734	1.159*10^-8
ANKRD39	ENSG00000213337	protein_coding	0.552578	0.000*10^+0
H4C3	ENSG00000197061	protein_coding	0.485913	6.965*10^-11
RP9	ENSG00000164610	protein_coding	0.425235	2.356*10^-8
UBE2I	ENSG00000103275	protein_coding	0.453783	1.982*10^-9
FKBPL	ENSG00000204315	protein_coding	0.413863	5.896*10^-8
NOL10	ENSG00000115761	protein_coding	0.403814	1.290*10^-7
SNRPG	ENSG00000143977	protein_coding	0.707963	0.000*10^+0
SDHB	ENSG00000117118	protein_coding	0.467907	5.123*10^-10
KMT2C	ENSG00000055609	protein_coding	-0.430121	1.571*10^-8
TMEM223	ENSG00000168569	protein_coding	0.473208	2.974*10^-10
MTA3	ENSG00000057935	protein_coding	0.487621	5.582*10^-11
PSMG1	ENSG00000183527	protein_coding	0.450898	2.580*10^-9
SMYD5	ENSG00000135632	protein_coding	0.421958	3.080*10^-8
TIMM50	ENSG00000105197	protein_coding	0.472912	3.068*10^-10
USE1	ENSG00000053501	protein_coding	0.412011	6.824*10^-8
SS18L2	ENSG00000008324	protein_coding	0.44529	4.265*10^-9
TTC27	ENSG00000018699	protein_coding	0.485018	7.795*10^-11
MND1	ENSG00000121211	protein_coding	0.456205	1.584*10^-9
CRIPT	ENSG00000119878	protein_coding	0.710613	0.000*10^+0
PGP	ENSG00000184207	protein_coding	0.426054	2.202*10^-8
PRDX6	ENSG00000117592	protein_coding	0.420533	3.457*10^-8
MRPL3	ENSG00000114686	protein_coding	0.474312	2.646*10^-10
NDUFB10	ENSG00000140990	protein_coding	0.437629	8.317*10^-9
RPA3P1	ENSG00000179997	processed_pseudogene	0.401526	1.186*10^-7
YDJC	ENSG00000161179	protein_coding	0.409437	8.350*10^-8
MRPL47	ENSG00000136522	protein_coding	0.519005	0.000*10^+0
NDUFA2	ENSG00000131495	protein_coding	0.454715	1.819*10^-9
HMGB3	ENSG00000029993	protein_coding	0.461229	9.857*10^-10
NAA10	ENSG00000102030	protein_coding	0.490822	3.580*10^-11
MTX1	ENSG00000173171	protein_coding	0.407972	9.360*10^-8
LYRM4	ENSG00000214113	protein_coding	0.471108	3.700*10^-10
CBX3	ENSG00000122565	protein_coding	0.414975	5.398*10^-8
OST4	ENSG00000228474	protein_coding	0.577247	0.000*10^+0
NDUFB11	ENSG00000147123	protein_coding	0.439825	6.882*10^-9
SEM1	ENSG00000127922	protein_coding	0.44514	4.322*10^-9
LCMT1	ENSG00000205629	protein_coding	0.453458	2.043*10^-9
GPN3	ENSG00000111231	protein_coding	0.491838	3.078*10^-11
ITGA4	ENSG00000115232	protein_coding	-0.429971	1.591*10^-8
SNRPF	ENSG00000139343	protein_coding	0.538953	0.000*10^+0
PFDN5	ENSG00000123349	protein_coding	0.447141	3.618*10^-9
KIF22	ENSG00000079616	protein_coding	0.504921	0.000*10^+0
LSM5	ENSG00000106355	protein_coding	0.501446	3.778*10^-12
NEDD8	ENSG00000129559	protein_coding	0.430319	1.546*10^-8
PCNA	ENSG00000132646	protein_coding	0.405059	1.172*10^-7
MYG1	ENSG00000139637	protein_coding	0.482754	1.027*10^-10
SARNP	ENSG00000205323	protein_coding	0.438792	7.525*10^-9
H2AC17	ENSG00000278677	protein_coding	0.424041	2.598*10^-8
BCAS2	ENSG00000116752	protein_coding	0.407774	9.504*10^-8
PRR7	ENSG00000131188	protein_coding	0.400529	1.658*10^-7
BUD31	ENSG00000106245	protein_coding	0.425325	2.338*10^-8
CNBP	ENSG00000169714	protein_coding	0.421873	3.101*10^-8
PABPN1	ENSG00000100836	protein_coding	0.494948	1.853*10^-11
NAE1	ENSG00000159593	protein_coding	0.425201	2.362*10^-8
MRGBP	ENSG00000101189	protein_coding	0.465703	6.380*10^-10
POLR3K	ENSG00000161980	protein_coding	0.548982	0.000*10^+0
ATP5F1E	ENSG00000124172	protein_coding	0.414306	5.693*10^-8
AFF1	ENSG00000172493	protein_coding	-0.478413	1.693*10^-10
BIRC5	ENSG00000089685	protein_coding	0.419155	3.864*10^-8
RPL31P28	ENSG00000219863	processed_pseudogene	0.416323	3.586*10^-8
PSMA2	ENSG00000106588	protein_coding	0.522246	0.000*10^+0
SNRPC	ENSG00000124562	protein_coding	0.546791	0.000*10^+0
RPL24	ENSG00000114391	protein_coding	0.454788	1.807*10^-9
DPM1	ENSG00000000419	protein_coding	0.4171	4.557*10^-8
ZBTB8OS	ENSG00000176261	protein_coding	0.503746	8.887*10^-13
ANP32E	ENSG00000143401	protein_coding	0.41218	6.734*10^-8
H2AC20	ENSG00000184260	protein_coding	0.46935	4.429*10^-10
CNPY2	ENSG00000257727	protein_coding	0.404582	1.216*10^-7
THUMPD2	ENSG00000138050	protein_coding	0.434332	1.102*10^-8
PSENEN	ENSG00000205155	protein_coding	0.424453	2.512*10^-8
RAE1	ENSG00000101146	protein_coding	0.404579	1.217*10^-7
AC092991.1	ENSG00000244740	processed_pseudogene	0.400118	1.325*10^-7
CDCA3	ENSG00000111665	protein_coding	0.479175	1.555*10^-10
UBE2S	ENSG00000108106	protein_coding	0.432469	1.290*10^-8
MRTO4	ENSG00000053372	protein_coding	0.474572	2.574*10^-10
MRPS26	ENSG00000125901	protein_coding	0.441595	5.901*10^-9
CCT3	ENSG00000163468	protein_coding	0.429435	1.664*10^-8
PFDN1	ENSG00000113068	protein_coding	0.425571	2.292*10^-8
GMNN	ENSG00000112312	protein_coding	0.481168	1.238*10^-10
EEF1G	ENSG00000254772	protein_coding	0.406682	1.034*10^-7
ABT1	ENSG00000146109	protein_coding	0.46594	6.232*10^-10
PSMG3	ENSG00000157778	protein_coding	0.540678	0.000*10^+0
PFDN4	ENSG00000101132	protein_coding	0.588877	0.000*10^+0
SAMD1	ENSG00000141858	protein_coding	0.433452	1.187*10^-8
EID2	ENSG00000176396	protein_coding	0.409355	8.404*10^-8
UNG	ENSG00000076248	protein_coding	0.409584	8.255*10^-8
EBNA1BP2	ENSG00000117395	protein_coding	0.551189	0.000*10^+0
PHACTR2	ENSG00000112419	protein_coding	-0.405979	1.092*10^-7
AUNIP	ENSG00000127423	protein_coding	0.455858	1.636*10^-9
DUSP11	ENSG00000144048	protein_coding	0.426254	2.166*10^-8
MRPL12	ENSG00000262814	protein_coding	0.442656	5.378*10^-9
TARDBP	ENSG00000120948	protein_coding	0.481422	1.202*10^-10
PFDN6	ENSG00000204220	protein_coding	0.585879	0.000*10^+0
LAGE3	ENSG00000196976	protein_coding	0.474143	2.694*10^-10
UQCR10	ENSG00000184076	protein_coding	0.438197	7.921*10^-9
AURKB	ENSG00000178999	protein_coding	0.445087	4.343*10^-9
DARS1	ENSG00000115866	protein_coding	0.481919	1.134*10^-10
UQCC3	ENSG00000204922	protein_coding	0.442879	5.274*10^-9
ARL6IP6	ENSG00000177917	protein_coding	0.41653	4.769*10^-8
MRPL9	ENSG00000143436	protein_coding	0.574272	0.000*10^+0
TEDC2	ENSG00000162062	protein_coding	0.441217	6.099*10^-9
ZNRD2	ENSG00000173465	protein_coding	0.425989	2.214*10^-8
NCBP2AS2	ENSG00000270170	protein_coding	0.430965	1.464*10^-8
FAU	ENSG00000149806	protein_coding	0.456843	1.493*10^-9
RPL39	ENSG00000198918	protein_coding	0.447819	3.405*10^-9
MRPL17	ENSG00000158042	protein_coding	0.449814	2.846*10^-9
WDR83OS	ENSG00000105583	protein_coding	0.406642	1.038*10^-7
UTP11	ENSG00000183520	protein_coding	0.503475	1.183*10^-12
CWC15	ENSG00000150316	protein_coding	0.434372	1.098*10^-8
HSPE1P4	ENSG00000258153	processed_pseudogene	0.403907	1.281*10^-7
UBL5	ENSG00000198258	protein_coding	0.409366	8.396*10^-8
CKS1B	ENSG00000173207	protein_coding	0.549236	0.000*10^+0
SF3B4	ENSG00000143368	protein_coding	0.551697	0.000*10^+0
CCDC58	ENSG00000160124	protein_coding	0.505996	0.000*10^+0
TBCA	ENSG00000171530	protein_coding	0.500966	4.503*10^-12
MRPL55	ENSG00000162910	protein_coding	0.532664	0.000*10^+0
CCNB1	ENSG00000134057	protein_coding	0.450955	2.567*10^-9
TBC1D2B	ENSG00000167202	protein_coding	-0.433503	1.182*10^-8
POLR2C	ENSG00000102978	protein_coding	0.407859	9.442*10^-8
RHNO1	ENSG00000171792	protein_coding	0.403794	1.292*10^-7
NUP37	ENSG00000075188	protein_coding	0.443178	5.138*10^-9
AC097263.1	ENSG00000228519	processed_pseudogene	0.414492	5.609*10^-8
CENPS	ENSG00000175279	protein_coding	0.490201	3.916*10^-11
UBE2V2	ENSG00000169139	protein_coding	0.4711	3.703*10^-10
ANAPC11	ENSG00000141552	protein_coding	0.413789	5.931*10^-8
BANF1	ENSG00000175334	protein_coding	0.57104	0.000*10^+0
FAAP20	ENSG00000162585	protein_coding	0.426697	2.088*10^-8
SUPT7L	ENSG00000119760	protein_coding	0.483186	9.752*10^-11
FAM72C	ENSG00000263513	protein_coding	0.429672	1.631*10^-8
KNSTRN	ENSG00000128944	protein_coding	0.429602	1.641*10^-8
PDCD5	ENSG00000105185	protein_coding	0.551539	0.000*10^+0
SRSF2	ENSG00000161547	protein_coding	0.548747	0.000*10^+0
PSMD4	ENSG00000159352	protein_coding	0.603244	0.000*10^+0
LSM6	ENSG00000164167	protein_coding	0.46056	1.051*10^-9
MTFR2	ENSG00000146410	protein_coding	0.475743	2.270*10^-10
RPS27A	ENSG00000143947	protein_coding	0.566296	0.000*10^+0
MRPL52	ENSG00000172590	protein_coding	0.404051	1.267*10^-7
CCT4	ENSG00000115484	protein_coding	0.560588	0.000*10^+0
ENSA	ENSG00000143420	protein_coding	0.416381	4.827*10^-8
UBE2SP1	ENSG00000233966	processed_pseudogene	0.419076	3.888*10^-8
